# Supplementary material for: Clinical effect of conbercept on improving diabetic macular ischemia by OCT angiography
Source: BMC Ophthalmol. 2020 Sep 25;20:382. doi: 10.1186/s12886-020-01648-x (PMC7519504; doi:10.1186/s12886-020-01648-x)
Supplement: Supplementary file 1 — Additional file 1:. [file 12886_2020_1648_MOESM1_ESM.xlsx]

## Sheet: Sheet1
NO.	eye	Q score	FAZ area,mm2	CFT,um	SVD,%	DVD,%	Q score	FAZ area,mm2	CFT,um	SVD,%	DVD,%	Q score	FAZ area,mm2	CFT,um	SVD,%	DVD,%
non-ischemia group			month 0					month 3					month 6
1	os	9	0.382	261	47.9	44.5	9	0.409	290	49.9	43.8	8	0.379	276	48.4	36.4		配对样P3:Z38本检验
2	os	7	0.218	451	46.2	45.6	8	0.305	367	46.1	46.4	7	0.243	412	47.5	47.3				配对差值					t	自由度	Sig.（双尾）
3	od	9	0.371	453	42.7	49.4	8	0.402	425	46.2	40.4	7	0.39	438	43.3	40.5				平均值	标准 偏差	标准 误差平均值	差值 95% 置信区间
4	os	7	0.406	529	43.5	46	7	0.35	326	42	47.4	7	0.293	389	45.2	48.4							下限	上限
5	od	7	0.486	353	45.1	34.9	7	0.452	270	46.8	47.5	9	0.43	267	49.3	45.8		配对 1	VAR00001 - VAR00006	-0.01505	0.05758	0.01321	-0.04281	0.0127	-1.139	18	0.269
6	od	7	0.169	643	47.6	44	8	0.149	475	49.5	41.5	8	0.106	517	48.4	39.7		配对 2	VAR00006 - VAR00011	0.00132	0.06109	0.01401	-0.02813	0.03076	0.094	18	0.926
7	os	8	0.272	268	48.4	38.2	8	0.297	198	49.3	43.6	9	0.291	202	48.4	43		配对 3	VAR00002 - VAR00007	97.6316	132.898	30.4889	33.5767	161.686	3.202	18	0.005
8	os	7	0.331	408	37.9	43.4	8	0.378	402	42.5	40.9	7	0.409	356	37.4	36.9		配对 4	VAR00007 - VAR00012	16.2632	60.265	13.8257	-12.7836	45.31	1.176	18	0.255
9	od	9	0.482	555	42.7	44.3	7	0.469	237	40.2	45.3	7	0.512	186	45.9	39		配对 5	VAR00003 - VAR00008	-1.21053	3.11678	0.71504	-2.71277	0.29171	-1.693	18	0.108
10	os	8	0.583	509	44.3	44.4	8	0.599	181	44.1	39.9	7	0.504	200	44.3	47.4		配对 6	VAR00008 - VAR00013	0.34211	3.3958	0.77905	-1.29462	1.97883	0.439	18	0.666
11	os	7	0.305	395	41.9	46.1	8	0.294	230	49.3	42.3	7	0.327	213	42.8	42.6		配对 7	VAR00004 - VAR00009	-0.19474	5.65612	1.2976	-2.9209	2.53142	-0.15	18	0.882
12	od	7	0.252	606	45.4	42.8	7	0.232	560	51.6	46.4	8	0.24	499	47.9	46.8		配对 8	VAR00009 - VAR00014	0.31579	4.01985	0.92222	-1.62172	2.25329	0.342	18	0.736
13	od	9	0.2	547	49.2	49.1	8	0.336	448	46.7	37.6	9	0.373	472	48.8	34.6
14	os	8	0.343	512	45.5	44.8	8	0.387	173	43.4	41.3	8	0.41	161	42.5	44.8
15	od	8	0.366	407	41.5	42.7	8	0.363	281	43.7	50.3	9	0.395	246	48.2	43.7
16	os	8	0.502	244	41.2	37.8	9	0.487	209	46.6	43.9	9	0.553	207	43.5	44.7
17	od	7	0.414	323	42.3	43.2	7	0.526	311	39.5	44.4	7	0.69	309	43	45.2
18	os	8	0.225	318	48.7	42.2	7	0.265	389	46.9	42.7	9	0.212	332	42.8	48.2
19	od	8	0.61	394	49.6	44.9	7	0.503	549	50.3	46.4	10	0.421	330	50.5	51
		7.78947	0.364053	430.316	44.8211	43.5947	7.73684	0.379105	332.684	46.0316	43.7895	8	0.377789	316.421	45.6895	43.4737
		0.787327	0.127486	118.38	3.22999	3.55301	0.653376	0.111017	120.248	3.50572	3.1663	1	0.134371	112.675	3.31577	4.54702
ischemia group
20	od	9	0.24	256	38.7	45.7	7	0.343	274	35.3	41.9	10	0.164	251	39.6	37.2		配对样本检验
21	od	7	0.945	398	45.6	42.2	8	0.892	424	49.8	46.1	8	0.764	372	45.9	46.1				配对差值					t	自由度	Sig.（双尾）
22	os	7	0.566	383	37.3	38.9	8	0.61	249	37.8	34.1	8	0.594	249	37	34				平均值	标准 偏差	标准 误差平均值	差值 95% 置信区间
23	od	7	0.827	310	40.2	40.1	8	0.566	285	45.41	41.4	7	0.46	329	38.1	41.8							下限	上限
24	od	8	0.307	384	36.8	36.9	7	0.219	339	43.1	45.7	9	0.231	318	47	42.7		配对 1	VAR00001 - VAR00006	0.0643	0.10771	0.01966	0.02408	0.10452	3.27	29	0.003
25	os	8	0.386	254	38.7	39	9	0.208	265	39.2	42.1	9	0.281	248	42.7	41.9		配对 2	VAR00006 - VAR00011	0.02404	0.11475	0.0225	-0.02231	0.07039	1.068	25	0.296
26	os	8	0.56	359	42.4	34.9	9	0.37	235	49.1	48.8	8	0.519	230	47.7	49.1		配对 3	VAR00002 - VAR00007	31.0333	124.667	22.7611	-15.5182	77.5849	1.363	29	0.183
27	od	9	0.339	256	48.3	40.8	7	0.287	265	46	40	7	0.293	265	47	36.2		配对 4	VAR00007 - VAR00012	0.88462	119.146	23.3665	-47.2395	49.0087	0.038	25	0.97
28	os	7	0.359	360	42.6	37.7	7	0.387	261	36.6	39	7	0.391	256	39	43.9		配对 5	VAR00003 - VAR00008	-1.65367	4.27481	0.78047	-3.24991	-0.05743	-2.119	29	0.043
29	os	7	0.322	239	39.2	37.9	8	0.297	288	43	44							配对 6	VAR00008 - VAR00013	-0.19962	4.23552	0.83065	-1.91038	1.51115	-0.24	25	0.812
30	os	8	0.541	256	42	44.3	7	0.55	207	41.3	39.3	7	0.545	204	39.2	39.5		配对 7	VAR00004 - VAR00009	-1.93	5.65205	1.03192	-4.04051	0.18051	-1.87	29	0.072
31	od	8	0.7	287	45.4	49.1	7	0.523	189	38.3	40.5	9	0.513	189	45.4	51.1		配对 8	VAR00009 - VAR00014	-0.03462	3.59243	0.70453	-1.48563	1.4164	-0.049	25	0.961
32	os	9	0.513	394	42	42.4	7	0.597	471	37.9	42.4	7	0.595	192	42.2	43.6
33	od	9	0.676	241	41.2	40.8	9	0.693	235	41.2	40.5	9	0.664	238	39.9	39.1
34	od	7	0.488	403	42	41	7	0.391	322	39.6	41.9	8	0.299	389	43.2	45.5
35	os	7	0.23	248	38.4	42.6	10	0.232	235	41.4	42.6	9	0.241	233	41.2	40.6
36	od	7	0.435	243	44.8	41.4	10	0.491	230	44.8	48.5	9	0.481	232	45.7	47.9
37	os	7	0.58	269	40.4	41.3	8	0.561	415	47.2	42.7	8	0.5	367	45	39.8
38	od	7	0.494	256	37.9	43.1	10	0.484	243	46.8	40.6	9	0.489	235	39.1	39
39	os	7	0.699	241	34.2	30.4	9	0.623	227	35.9	38.2	7	0.311	230	46.2	39.5
40	os	9	0.467	313	35.3	33.2	7	0.397	286	44.3	44	7	0.409	264	44.1	45.9
41	od	7	0.631	200	45.5	44.1	7	0.484	203	48	43.8
42	os	8	0.436	666	48.9	42.9	7	0.207	352	50	39.8	8	0.291	741	49.6	42.3
43	od	8	0.604	297	39.2	43.5	8	0.487	259	41.7	42.4	9	0.464	222	40.4	43.1
44	od	7	0.632	312	38.6	35.4	9	0.293	287	44.1	49.2
45	od	7	0.656	271	39.9	35.9	8	0.512	293	47.3	38.8	8	0.32	310	39.9	41.3
46	os	9	0.43	318	38.7	43.4	7	0.364	631	36.9	43.3	7	0.631	352	35.6	34.5
47	od	7	0.281	620	35.1	42.1	7	0.35	194	32.7	35.3	7	0.194	299	31.5	37.8
48	os	9	0.67	312	51	52						9	0.399	216	51	53.4
49	od	8	0.361	315	40.2	38.7	7	0.394	300	44.1	44.8
50	os	8	0.44	536	44.6	40.9	8	0.404	490	44.9	46.8	8	0.479	638	47.5	44.2
		7.74194	0.510161	328.935	41.1323	40.729	7.9	0.440533	298.467	42.457	42.2833	8.07407	0.426741	298.852	42.6185	42.2593
		0.815179	0.171345	108.897	4.09507	4.37441	1.02889	0.157902	99.2422	4.66252	3.60728	0.916764	0.153477	126.451	4.59557	4.74368
